# Supplementary material
Source: publisher site journal article supplement (https://www.spandidos-publications.com/5757/downloadSupplementary)
Supplement: Supplementary file 1 [file downloadSupplementary]

## Sheet: Sheet1
Table SIV. Significantly different metabolites involved in amino acid synthesis in PKC and HKT groups.
Ionisation mode	Metabolites	Mean PKC	Mean HKT	VIP	P-value	Log2Foldchange	Regulation
ESI+	5-Hydroxylysine	1.33243e+08	1.4984e+07	1.5397	8.84971e-05	-3.15256	Down
ESI+	N-Acetyl-L-tyrosine	6.91004e+06	1.53651e+06	1.46119	0.00055337	-2.16903	Down
ESI+	Cysteinylglycine	4.5366e+06	1.19558e+06	1.59242	4.10484e-05	-1.9239	Down
ESI+	N6-Succinyl Adenosine	5.17354e+09	1.517e+09	1.41219	0.00304235	-1.76993	Down
ESI+	Asp-Phe	4.03397e+06	1.52266e+06	1.36823	0.00267755	-1.40561	Down
ESI+	N-Acetyl-L-leucine	4.02221e+07	1.5622e+07	1.33231	0.00433339	-1.36441	Down
ESI+	H-Gly-Pro-OH	3.34378e+07	1.45559e+07	1.25357	0.0131225	-1.19988	Down
ESI+	2'-O-Methyladenosine	2.38763e+07	1.07207e+07	1.31736	0.0121524	-1.15518	Down
ESI+	S-Adenosyl-L-methionine	605332	314347	1.23392	0.0119858	-0.945369	Down
ESI+	Glycitein	3.59364e+06	2.34669e+07	1.45885	0.00099547	2.70711	Up
ESI+	γ-Glutamylcysteine	945213	4.72489e+06	1.61314	1.5599e-05	2.32157	Up
ESI+	Gamma-Glutamyltyrosine	4.55788e+06	1.99719e+07	1.43715	0.00100765	2.13154	Up
ESI+	Gly-Tyr	2.44856e+06	4.19305e+06	1.32653	0.00703152	0.77607	Up
ESI+	L-Phenylalanine	3.25135e+09	5.55064e+09	1.25468	0.0157176	0.771613	Up
ESI+	1-Methylhistidine	1.12009e+07	1.79811e+07	1.09922	0.0471419	0.682867	Up
ESI-	L-Cysteine	9.32426e+07	1.11796e+07	1.22025	0.0363997	-3.06012	Down
ESI-	L-Hydroxylysine	7.26979e+07	9.82579e+06	1.57593	3.37946e-05	-2.88727	Down
ESI-	Alpha-Ketoglutaric acid	2.12748e+08	4.65803e+07	1.25463	0.0124744	-2.19136	Down
ESI-	Nicotinamide adenine dinucleotide	8.28595e+07	2.08261e+07	1.4273	0.00206829	-1.99227	Down
ESI-	Cis-Aconitic acid	1.05235e+09	3.37013e+08	1.3461	0.0113333	-1.64274	Down
ESI-	Nicotinamide adenine dinucleotide phosphate	2.89763e+06	1.04535e+06	1.45059	0.00105926	-1.47088	Down
ESI-	N-Acetyl-D-alloisoleucine	3.01746e+07	1.21394e+07	1.37867	0.00342007	-1.31364	Down
ESI-	N-Acetyl valine	5.79364e+07	2.63885e+07	1.37589	0.00392728	-1.13456	Down
ESI-	N-Acetyl glycine	1.59985e+07	7.56541e+06	1.24605	0.0172849	-1.08045	Down
ESI-	Acetoacetate	4.31226e+07	2.18353e+07	1.24756	0.0152041	-0.981782	Down
ESI-	N-Acetyl-DL-glutamic acid	1.84398e+07	1.00958e+07	1.36418	0.00382558	-0.869065	Down
ESI-	5-Oxoproline	1.15786e+09	6.77991e+08	1.10323	0.0432381	-0.772118	Down
ESI-	D-Phenylalanine	8.0247e+08	1.74094e+09	1.51578	0.00177233	1.11734	Up
ESI-	L-Serine	3.96585e+07	7.32799e+07	1.5891	2.78224e-05	0.885786	Up
ESI-	Cys-Gly	1.09413e+06	1.6446e+06	1.15211	0.0366643	0.58796	Up
PKC, plain normoxia group; HCT, plateau hypoxia group; ESI
